# Supplementary figures and images for: Assessment the effect of genomic selection and detection of selective signature in broilers
Source: PubMed Central journal article supplement — Poult Sci. 2022 Mar 12;101(6):101856. doi: 10.1016/j.psj.2022.101856 (PMC9018145; doi:10.1016/j.psj.2022.101856), 2022-03-12

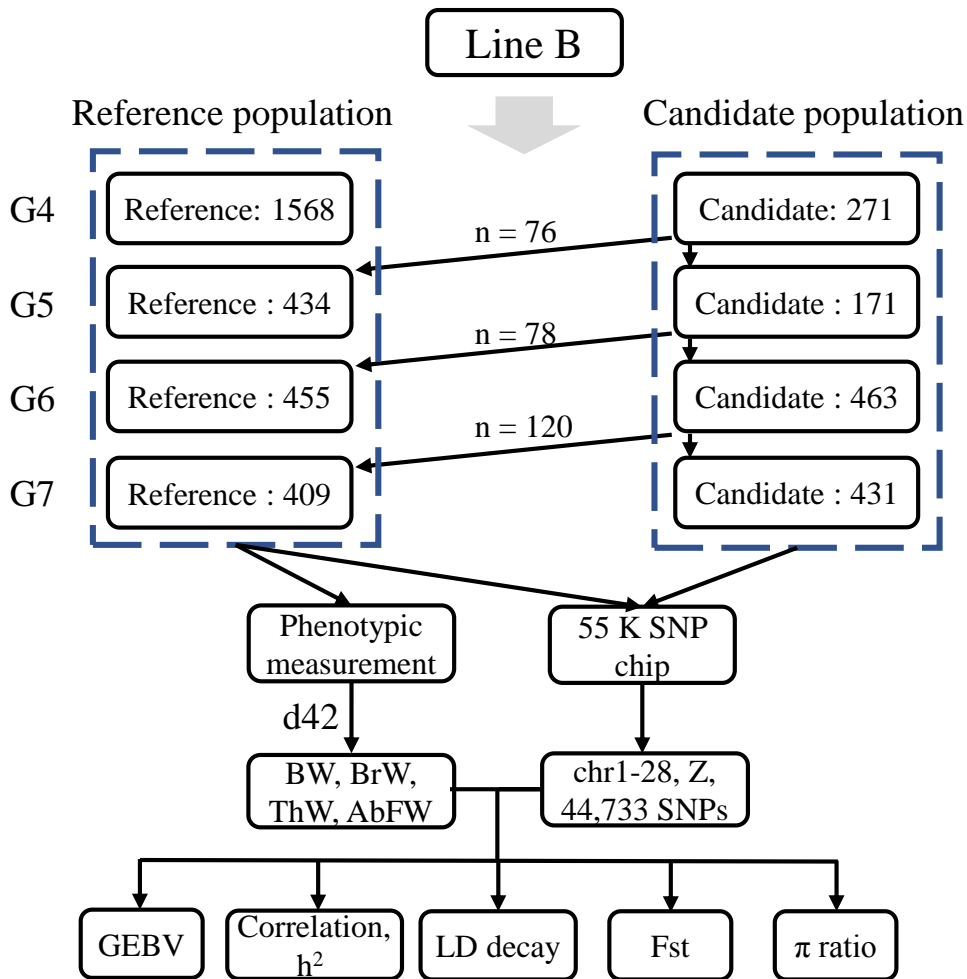

Supplement: mmc1.pdf [file mmc1.pdf]
